# Supplementary material for: Context-dependent modulations of subthalamo-cortical synchronization during rapid reversals of movement direction in Parkinson’s disease
Source: eLife. 2025 Jun 5;13:RP101769. doi: 10.7554/eLife.101769 (PMC12140627; doi:10.7554/eLife.101769)
Supplement: Supplementary file 7. [file elife-101769-supp7.xlsx]

## Sheet: RTs
pred_start	pred_stop	pred_rev	unpred_start	unpred_stop	unpred_rev	age_normalized	updrs_normalized	diseasedur_normalized
0.92485	0.94678	0.81389	0.88318	1.2094	0.71	0.581251	-0.0716961	-1.04244
0.62249	1.1069	0.7055	0.61935	1.182	0.63526	0.16107	0.856135	3.07059
0.58525	0.96587	0.5662	0.67864	1.2487	0.60796	-0.259112	0.181349	-0.616955
0.97745	0.98149	0.56543	0.82774	0.96794	0.54851	-1.23954	2.7118	-1.18427
0.75115	0.91999	0.764	0.89861	0.79925	0.72675	0.0210091	1.02483	1.08499
0.68019	0.92105	0.83902	0.86064	1.0883	0.81329	1.28155	-0.830831	0.375846
0.48631	0.50011	0.55116	0.5113	0.53465	0.501	0.0210091	-0.915179	0.375846
0.75353	0.65956	0.56495	0.83524	0.68225	0.53473	2.40204	-1.16822	0.375846
0.98861	0.5942	0.88978	1.0055	0.69666	0.95067	0.30113	-0.493438	0.0921886
0.64549	0.78278	0.76264	0.96582	0.82484	0.63677	-1.09948	0.0126522	-0.758783
0.7213	0.57878	0.57662	0.81255	0.5884	0.54631	0.441191	-0.324741	0.234017
0.94325	0.5463	0.61325	0.91373	0.56427	0.72097	1.00143	-0.324741	-0.191469
0.99347	0.58456	0.60206	1.2746	0.87994	0.94753	-0.119051	0.603091	0.375846
0.69091	1.0178	0.54839	0.79475	1.0774	0.57353	-0.119051	-0.746483	-0.900612
0.92755	0.98461	0.81898	1.001	0.90641	0.78034	-0.259112	0.350046	0.943161
0.81411	1.0212	0.73792	0.88562	1.2767	0.75888	0.30113	-0.746483	-0.758783
0.56432	0.66232	0.57182	0.74456	0.75524	0.59854	-0.119051	-0.999528	0.234017
0.66116	0.71427	0.53861	0.76969	0.68156	0.52164	-2.21996	-0.830831	-0.900612
0.69671	0.85974	0.79868	0.76649	0.85105	0.76584	0.30113	1.78397	0.234017
0.70525	1.1301	0.71619	0.75073	0.96248	0.66688	-1.3796	-0.0716961	-1.04244

## Sheet: movement_speed
pred_start	pred_stop	pred_rev	unpred_start	unpred_stop	unpred_rev	age_normalized	updrs_normalized	diseasedur_normalized
314.62	293.78	298.45	416.05	392.41	419.89	0.581251	-0.0716961	-1.04244
487.6	414.83	480.95	435.1	351.07	453.79	0.16107	0.856135	3.07059
655.36	531.56	706.69	670.23	522	754.53	-0.259112	0.181349	-0.616955
393.59	350.66	374.14	356.63	340.51	368.62	-1.23954	2.7118	-1.18427
418.92	508.2	522.87	285.87	336.19	334.06	0.0210091	1.02483	1.08499
561.04	551.32	612.4	575.02	549.13	661.82	1.28155	-0.830831	0.375846
580.03	672.62	643.73	557.54	580.69	610.68	0.0210091	-0.915179	0.375846
467.66	464.71	483.05	474.97	471.62	484.84	2.40204	-1.16822	0.375846
498.01	477.39	485.78	472.99	436.87	470.13	0.30113	-0.493438	0.0921886
385.29	413.64	482.12	459.39	432.24	536.64	-1.09948	0.0126522	-0.758783
328.1	311.43	318.62	248.07	241.48	257.95	0.441191	-0.324741	0.234017
230.6	210.96	247.89	276.61	264.28	274.26	1.00143	-0.324741	-0.191469
255.98	262.5	290.38	367.9	331.45	357.87	-0.119051	0.603091	0.375846
504.74	458.32	564.04	491.91	434.41	530.17	-0.119051	-0.746483	-0.900612
421.47	387.56	438.63	502.52	498.12	534.54	-0.259112	0.350046	0.943161
613.75	524.77	637.58	591.08	483.76	676.31	0.30113	-0.746483	-0.758783
690.58	627.58	696.89	678.86	579.12	656.41	-0.119051	-0.999528	0.234017
295.32	274.59	311.77	279.44	267.09	311.22	-2.21996	-0.830831	-0.900612
371.5	369.27	406.62	352.17	369.94	382.78	0.30113	1.78397	0.234017
388.26	334.64	382.29	365.83	335.12	372.34	-1.3796	-0.0716961	-1.04244
