# Supplementary material for: Context-dependent modulations of subthalamo-cortical synchronization during rapid reversals of movement direction in Parkinson’s disease
Source: eLife. 2025 Jun 5;13:RP101769. doi: 10.7554/eLife.101769 (PMC12140627; doi:10.7554/eLife.101769)
Supplement: Supplementary file 8. [file elife-101769-supp8.xlsx]

## Sheet: power_beta
contraSTN_pred_start	contraSTN_pred_stop	contraSTN_pred_rev	contraSTN_unpred_start	contraSTN_unpred_stop	contraSTN_unpred_rev	contraM1_pred_start	contraM1_pred_stop	contraM1_pred_rev	contraM1_unpred_start	contraM1_unpred_stop	contraM1_unpred_rev	contraMSMC_pred_start	contraMSMC_pred_stop	contraMSMC_pred_rev	contraMSMC_unpred_start	contraMSMC_unpred_stop	contraMSMC_unpred_rev	ipsiSTN_pred_start	ipsiSTN_pred_stop	ipsiSTN_pred_rev	ipsiSTN_unpred_start	ipsiSTN_unpred_stop	ipsiSTN_unpred_rev	ipsiM1_pred_start	ipsiM1_pred_stop	ipsiM1_pred_rev	ipsiM1_unpred_start	ipsiM1_unpred_stop	ipsiM1_unpred_rev	ipsiMSMC_pred_start	ipsiMSMC_pred_stop	ipsiMSMC_pred_rev	ipsiMSMC_unpred_start	ipsiMSMC_unpred_stop	ipsiMSMC_unpred_rev	speed_normalized	age_normalized	updrs_normalized	diseasedur_normalized
-0.097281	0.088088	0.011305	-0.20758	0.21269	0.030809	-0.1235	0.12828	0.0058264	-0.039622	0.10349	-0.0058517	-0.090955	0.094825	0.022057	-0.072505	0.091258	0.01118	-0.096469	0.11077	0.054713	-0.11029	0.094597	-0.045129	-0.15811	0.098601	-0.020451	-0.10865	0.091175	-0.0095008	-0.088369	0.08279	0.031292	-0.07927	0.085577	0.0014007	-0.712522	0.581251	-0.0716961	-1.04244
-0.037902	0.21231	-0.015392	-0.16818	0.104	-0.036777	-0.2353	0.20728	-0.030063	-0.31056	0.22648	-0.06819	-0.099579	0.092753	-0.0086276	-0.13811	0.070522	-0.027293	-0.17158	0.12085	-0.021107	-0.21253	0.20399	-0.0018268	-0.17845	0.068654	-0.087177	-0.2881	0.15859	-0.085142	-0.097108	0.063012	-0.021193	-0.12353	0.046862	-0.030642	-0.0505508	0.16107	0.856135	3.07059
-0.46368	0.46001	-0.010401	-0.5079	0.47359	-0.019153	-0.42132	0.33688	-0.0744	-0.43077	0.37302	-0.047405	-0.17128	0.10584	-0.041693	-0.1911	0.12149	-0.017426	-0.12238	0.11973	-0.10188	-0.23546	0.18437	-0.018112	-0.21295	0.03146	-0.097629	-0.23052	0.051344	-0.092772	-0.17295	0.084115	-0.078281	-0.21212	0.10857	-0.063904	1.59997	-0.259112	0.181349	-0.616955
-0.13421	0.1477	-0.0087259	-0.15804	0.153	-0.037172	-0.33579	0.29846	-0.05341	-0.30735	0.27868	-0.059555	-0.14975	0.22203	-0.01837	-0.24013	0.29251	-0.065847	-0.14283	0.15363	-0.096071	-0.20646	0.16137	-0.13387	-0.1912	0.13962	-0.087073	-0.15634	0.11737	-0.093043	-0.094185	0.123	-0.050571	-0.15485	0.13202	-0.079318	-0.646167	-1.23954	2.7118	-1.18427
-0.3962	0.48443	-0.042312	-0.33226	0.54605	-0.023541	-0.46283	0.49632	0.030939	-0.42632	0.49044	-0.0093703	-0.32133	0.33876	-0.012281	-0.27193	0.34092	-0.036196	-0.29794	0.34256	-0.053096	-0.22719	0.36449	0.0048117	-0.30477	0.17387	0.013153	-0.26429	0.16743	-0.098945	-0.23117	0.23866	-0.015745	-0.21539	0.22473	-0.044492	-0.345134	0.0210091	1.02483	1.08499
-0.099527	0.4251	0.21169	-0.022105	0.34278	0.16182	-0.34505	0.24578	0.021731	-0.29879	0.26696	0.00042303	-0.13878	0.24578	0.050471	-0.076445	0.23139	0.10161	0.015641	-0.086854	-0.019672	0.040596	-0.10539	-0.0084863	-0.25863	0.15917	0.013758	-0.20534	0.097667	0.0080234	-0.14153	0.18489	0.058692	-0.1172	0.14787	0.036573	1.1529	1.28155	-0.830831	0.375846
-0.33355	0.23699	-0.008258	-0.30365	0.22331	-0.04308	-0.25226	0.17988	-0.041307	-0.27059	0.21539	-0.024026	-0.15769	0.14052	-0.028482	-0.19446	0.14754	-0.021317	-0.13577	-0.00065212	0.0060555	-0.23317	0.017539	-0.039778	-0.15253	0.056549	-0.062354	-0.20454	0.04694	-0.049644	-0.13947	0.094874	-0.045352	-0.15358	0.062007	-0.03683	1.33538	0.0210091	-0.915179	0.375846
-0.46405	0.49155	0.069358	-0.22935	0.43142	0.13601	-0.289	0.35143	-0.00081351	-0.22889	0.3316	0.0023026	-0.0010316	0.085074	0.038408	0.04125	0.08773	0.05073	-0.30161	0.26791	0.074836	-0.16749	0.25664	0.1013	-0.12248	0.080602	-0.045434	-0.13696	0.10238	-0.028091	-0.031317	0.11933	0.035794	0.0096263	0.090608	0.050792	0.252567	2.40204	-1.16822	0.375846
-0.093115	0.081157	0.015956	-0.056594	0.051373	0.014388	-0.14853	0.16223	-0.0064921	-0.22991	0.20593	-0.011825	-0.046088	0.051775	-0.019831	-0.066901	0.066795	0.013058	-0.17781	0.37339	0.076565	0.07349	0.016487	0.066659	-0.10124	0.028932	-0.046947	-0.11681	0.017697	-0.020863	-0.020358	0.0031447	-0.022676	-0.02008	0.032914	0.033795	0.244894	0.30113	-0.493438	0.0921886
0.12192	-0.11494	0.082703	0.1705	0.10465	0.0022709	-0.1346	0.14876	0.0050303	-0.1307	0.12806	-0.0096701	-0.096659	0.077935	-0.0070086	-0.16092	0.090077	-0.012222	0.03893	-0.075426	0.054909	0.078637	0.086902	0.033937	-0.22791	0.039751	-0.056804	-0.25032	0.025638	-0.078662	-0.078285	0.033916	-0.0095313	-0.059888	0.017416	0.0043999	0.0660612	-1.09948	0.0126522	-0.758783
-0.21541	0.25677	-0.03246	-0.1678	0.23417	-0.020507	-0.46409	0.54203	0.001544	-0.44334	0.56626	-0.011643	-0.19921	0.24093	-0.028152	-0.15349	0.28788	-0.0096055	-0.08944	0.16394	0.0031921	-0.093484	0.20793	-0.019669	-0.29925	0.35414	-0.012138	-0.26149	0.39564	-0.0089064	-0.16133	0.22707	-0.0052322	-0.10529	0.25403	0.020918	-1.2951	0.441191	-0.324741	0.234017
-0.16983	0.31364	0.025533	-0.1711	0.33752	-0.01174	-0.34459	0.36781	0.0012373	-0.34024	0.37218	-0.045192	-0.13004	0.21028	0.03602	-0.089646	0.18922	-0.0085146	-0.064272	0.18935	-0.00019485	-0.046534	0.20326	0.023991	-0.29311	0.37785	-0.014907	-0.27382	0.37211	-0.064142	-0.095098	0.18631	0.023703	-0.071805	0.17468	0.013626	-1.56773	1.00143	-0.324741	-0.191469
-0.10348	0.092484	0.0016418	-0.053313	0.020023	-0.031456	-0.29013	0.2529	-0.066553	-0.17459	0.12482	-0.047488	-0.098348	0.10001	-0.033398	-0.077809	0.10256	-0.01865	-0.059675	0.075581	-0.01343	-0.12959	0.081812	-0.049841	-0.19486	0.055362	-0.089033	-0.129	0.031016	-0.096574	-0.13107	0.10992	-0.050068	-0.11142	0.11868	-0.021511	-1.07753	-0.119051	0.603091	0.375846
-0.28368	0.40552	-0.014994	-0.27288	0.3105	-0.049459	-0.26503	0.25987	0.0063225	-0.27448	0.25529	-0.028297	-0.22196	0.22668	-0.017462	-0.1202	0.1056	-0.061763	-0.14097	0.098336	-0.065053	-0.19285	0.18364	-0.054555	-0.24861	0.12414	-0.11165	-0.2567	0.10692	-0.097241	-0.2363	0.18106	-0.072094	-0.1554	0.11901	-0.069486	0.438022	-0.119051	-0.746483	-0.900612
-0.076696	0.077346	0.023281	-0.017718	0.037296	0.032869	-0.33493	0.28847	-0.0051594	-0.30617	0.30633	-0.0072542	-0.15149	0.10129	-0.010101	-0.13634	0.10023	-0.030018	-0.078157	-0.034579	0.0066489	0.052424	-0.04474	0.039846	-0.23368	0.11924	-0.022156	-0.26185	0.12249	-0.037679	-0.16363	0.094067	-0.014513	-0.13427	0.10955	-0.023823	0.165763	-0.259112	0.350046	0.943161
-0.10274	0.35016	0.0021988	-0.084165	0.31159	0.019484	-0.26492	0.32556	0.012927	-0.21435	0.30283	-0.025626	-0.084233	0.15677	0.0096715	-0.031127	0.11922	-0.002264	-0.018269	0.068137	-0.012598	-0.064818	0.068996	-0.01299	-0.11107	0.12671	-0.0031417	-0.059011	0.1358	-0.040747	-0.045876	0.088568	0.0011744	0.0038472	0.071375	0.0051206	1.17531	0.30113	-0.746483	-0.758783
-0.25654	0.34396	0.036758	-0.23283	0.27662	0.054512	-0.20028	0.12102	-0.036579	-0.15663	0.072112	-0.043544	-0.12965	0.099142	-0.022064	-0.10875	0.083062	-0.01262	-0.12068	0.036125	0.039711	-0.075359	0.032933	0.033029	-0.11269	0.047486	-0.018134	-0.089857	0.016624	-0.018372	-0.06131	0.061908	-0.012512	-0.063084	0.043569	-0.0056921	1.72076	-0.119051	-0.999528	0.234017
-0.30815	0.35527	-0.0045041	-0.27464	0.35282	-0.0017405	-0.19041	0.16509	-0.034016	-0.13362	0.15509	-0.055726	-0.16574	0.18733	-0.0058738	-0.096126	0.15906	-0.044622	-0.055836	0.066589	0.033745	-0.043233	0.055564	0.032368	-0.12206	0.094437	-0.016111	-0.073524	0.061038	-0.066931	-0.15178	0.16994	-0.018386	-0.078388	0.14653	-0.048546	-1.24927	-2.21996	-0.830831	-0.900612
-0.047006	0.074142	-0.0095499	-0.089786	0.066346	0.0067218	-0.14518	-0.036613	-0.019314	-0.096823	0.047116	-0.006474	-0.118497	-0.04613	-0.022751	-0.100904	0.020826	-0.03026	-0.019302	-0.029594	0.015212	-0.0238205	-0.008776	-0.0070581	-0.055855	-0.002302	-0.0076865	-0.10098	0.033492	-0.051936	-0.10769	-0.020274	-0.017537	-0.09389	0.02995	-0.022007	-0.553751	0.30113	1.78397	0.234017
-0.085633	0.059559	-0.0040225	-0.072401	0.071641	0.0030525	-0.26015	0.2239	-0.031846	-0.25176	0.26623	-0.017474	-0.24256	0.22141	-0.019276	-0.23113	0.23774	-0.0030583	-0.14602	0.073946	-0.020265	-0.16021	0.15248	2.3e-05	-0.18496	0.12771	-0.028655	-0.13601	0.15952	-0.026621	-0.16719	0.13035	-0.018783	-0.15938	0.16357	-0.0040463	-0.653857	-1.3796	-0.0716961	-1.04244

## Sheet: power_gamma
ipsiSTIN_pred_start	ipsiSTIN_pred_stop	ipsiSTIN_pred_rev	ipsiSTIN_unpred_start	ipsiSTIN_unpred_stop	ipsiSTIN_unpred_rev	ipsiM1_pred_start	ipsiM1_pred_stop	ipsiM1_pred_rev	ipsiM1_unpred_start	ipsiM1_unpred_stop	ipsiM1_unpred_rev	ipsiMSMC_pred_start	ipsiMSMC_pred_stop	ipsiMSMC_pred_rev	ipsiMSMC_unpred_start	ipsiMSMC_unpred_stop	ipsiMSMC_unpred_rev	speed_normalized	age_normalized	updrs_normalized	diseasedur_normalized
0.032204	-0.085137	0.036046	0.001729	-0.033961	0.097144	0.028977	-0.098513	-0.047117	-0.095618	-0.081477	-0.0016603	-0.051059	-0.078474	-0.07653	-0.027456	0.054075	0.028198	-0.712522	0.581251	-0.0716961	-1.04244
-0.31757	0.2667	-0.021668	-0.139	-0.075951	-0.053873	-0.69463	0.58659	-0.1204	-0.73994	0.64519	-0.43389	-0.30384	0.09506	-0.31364	-0.25153	0.02059	-0.3845	-0.0505508	0.16107	0.856135	3.07059
-0.13462	0.059115	0.11911	-0.068431	0.31864	0.072707	0.065029	0.015487	-0.041507	-0.19677	0.03251	0.1207	0.0026677	0.1122	-0.075249	-0.069785	-0.095212	-0.086045	1.59997	-0.259112	0.181349	-0.616955
-0.0055422	-0.076515	-0.019826	0.12734	0.072026	-0.10828	-0.031388	0.057549	-0.078917	-0.12779	0.082894	-0.11686	-0.1264	-0.026036	-0.065393	0.0018552	0.055129	-0.083438	-0.646167	-1.23954	2.7118	-1.18427
0.20406	-0.22012	0.062899	0.0040869	0.23983	-0.18551	0.14113	0.01075	0.084754	0.050013	0.12362	-0.023001	0.013848	0.089976	-0.0039759	0.010764	0.078344	-0.039555	-0.345134	0.0210091	1.02483	1.08499
-0.043461	-0.34219	-0.022351	-0.053301	-0.31837	-0.19688	-0.039836	-0.07369	0.027855	-0.0020862	0.021495	-0.22635	-0.012581	-0.11887	0.065536	-0.057061	-0.096058	-0.069925	1.1529	1.28155	-0.830831	0.375846
0.030155	-0.091383	0.10228	0.15251	-0.18393	0.031989	0.30833	-0.45891	-0.041392	0.36543	-0.5823	0.40421	0.53891	-0.58491	0.024373	0.72417	-0.57149	0.34925	1.33538	0.0210091	-0.915179	0.375846
0.05526	-0.045529	-0.015215	0.022311	0.094728	-0.13641	-0.016556	0.039804	-0.016224	0.036581	0.047926	-0.035161	-0.075985	-0.064461	-0.031012	0.018567	0.012436	-0.16566	0.252567	2.40204	-1.16822	0.375846
-2.5478	2.9012	-0.011123	0.10925	-0.0095207	0.038376	-0.061705	-0.027241	0.0026958	-0.12094	-0.026176	-0.14613	0.08761	0.088414	-0.019698	-0.061118	0.022329	-0.13811	0.244894	0.30113	-0.493438	0.0921886
0.24701	0.10466	0.081808	0.14543	0.99034	0.10949	0.22131	-0.16229	0.11385	0.080009	-0.01042	-0.022789	0.52908	-0.20684	-0.012002	0.24196	-0.19151	0.14229	0.0660612	-1.09948	0.0126522	-0.758783
1.1101	-1.5195	0.19395	-0.010088	-0.30857	-0.83848	-0.048418	0.13644	0.015255	0.0093216	0.085694	0.055144	-0.055834	0.13845	0.020119	-0.0037514	0.094508	0.090788	-1.2951	0.441191	-0.324741	0.234017
0.29641	-0.0093036	-0.032612	0.054224	-0.22628	-0.0042052	0.10081	0.18605	-0.067073	-0.20304	-0.2798	-0.1403	-0.010064	0.048342	-0.06855	-0.0015854	-0.037819	0.050002	-1.56773	1.00143	-0.324741	-0.191469
0.17279	0.23033	-0.10555	0.67743	0.087968	0.19188	-0.10978	-0.060109	-0.032307	0.15167	0.052879	-0.1865	-0.0034743	-0.069174	-0.0044847	-0.10658	0.0045154	0.21965	-1.07753	-0.119051	0.603091	0.375846
-0.15679	0.092226	0.0037042	-0.14212	0.14536	-0.048827	-0.37486	0.47236	-0.16752	-0.44051	-0.08703	-0.38931	-0.039227	0.055658	-0.10966	-0.14675	-0.066201	-0.14522	0.438022	-0.119051	-0.746483	-0.900612
0.34677	0.036848	-0.024477	0.78102	-0.12948	0.038273	-0.1166	0.18472	0.020073	0.1919	-0.15836	0.077659	-0.063285	0.032553	-0.079889	0.048955	-0.069667	0.1145	0.165763	-0.259112	0.350046	0.943161
-0.025246	-0.16005	0.094001	-0.15525	0.11124	0.036499	-0.1103	-0.019866	-0.0062433	-0.044121	-0.0012028	-0.027206	-0.02639	0.0058852	0.02814	-0.082375	-0.14332	-0.025236	1.17531	0.30113	-0.746483	-0.758783
-0.075095	0.056921	0.1271	0.20082	-0.1342	0.13611	-0.063395	0.2729	-0.10278	-0.13037	-0.020374	0.010151	-0.16648	0.06478	-0.11473	0.059532	-0.29884	-0.12618	1.72076	-0.119051	-0.999528	0.234017
0.3842	0.17193	-0.019657	-0.031436	-0.075747	0.069614	0.028215	-0.022666	-0.078402	-0.055323	-0.010007	0.044463	-0.055573	0.038307	0.0082873	-0.12667	-0.047976	0.054304	-1.24927	-2.21996	-0.830831	-0.900612
-0.080693	-0.43771	-0.040746	-0.071854	-0.14995	-0.039412	-0.061541	-0.046407	-0.004512	0.64385	-0.99181	0.23079	0.085082	-0.21333	0.22083	0.48675	-0.73079	0.091886	-0.553751	0.30113	1.78397	0.234017
-0.047963	-0.22975	-0.028569	0.11538	-0.059233	-0.07762	-0.0595	-0.068262	-0.083247	0.059716	0.12227	-0.076993	-0.097356	-0.021061	-0.12413	0.020328	-0.11524	0.042841	-0.653857	-1.3796	-0.0716961	-1.04244
