# Supplementary material for: Context-dependent modulations of subthalamo-cortical synchronization during rapid reversals of movement direction in Parkinson’s disease
Source: eLife. 2025 Jun 5;13:RP101769. doi: 10.7554/eLife.101769 (PMC12140627; doi:10.7554/eLife.101769)
Supplement: Supplementary file 9. [file elife-101769-supp9.xlsx]

## Sheet: Lateralization_index
STN_pred_suppression	STN_pred_rebound	STN_unpred_suppression	STN_unpred_rebound	M1_pred_suppression	M1_pred_rebound	M1_unpred_suppression	M1_unpred_rebound	MSMC_pred_suppression	MSMC_pred_rebound	MSMC_unpred_suppression	MSMC_unpred_rebound	age_normalized	updrs_normalized	diseasedur_normalized
0.052086	-0.037954	0.36674	0.4008	-0.11933	0.12933	-0.43618	0.094967	0.0082181	0.060008	-0.041019	0.0544	0.581251	-0.0716961	-1.04244
-0.69651	0.29752	-0.097785	-0.32382	0.14687	0.48388	0.048322	0.18717	-0.0085949	0.19493	0.060563	0.21462	0.16107	0.856135	3.07059
0.60981	0.57259	0.3716	0.42861	0.33441	0.82456	0.31398	0.76863	-0.0078207	0.10434	-0.050974	0.050371	-0.259112	0.181349	-0.616955
-0.034849	-0.030114	-0.14738	-0.041556	0.26516	0.36082	0.32474	0.3981	0.21282	0.29599	0.20635	0.38046	-1.23954	2.7118	-1.18427
0.12234	0.15977	0.17816	0.18327	0.20163	0.48945	0.24005	0.50593	0.15797	0.17613	0.11897	0.20264	0.0210091	1.02483	1.08499
0.65425	0.68754	-0.65445	0.56003	0.16946	0.23024	0.20154	0.47591	-0.032337	0.14433	-0.24606	0.21353	1.28155	-0.830831	0.375846
0.41165	0.93654	0.13415	0.79637	0.25399	0.53188	0.13617	0.6261	0.063616	0.17031	0.11905	0.39825	0.0210091	-0.915179	0.375846
0.17834	0.26531	0.12942	0.22809	0.39181	0.64315	0.24363	0.53887	-0.92643	-0.17746	0.50165	-0.039269	2.40204	-1.16822	0.375846
-0.21004	-0.58848	-0.058551	0.52077	0.20225	0.69678	0.34372	0.82665	0.3855	0.7845	0.62247	0.3459	0.30113	-0.493438	0.0921886
0.58456	0.22368	0.37516	0.082733	-0.25395	0.59507	-0.32335	0.67991	0.10492	0.39725	0.46694	0.72791	-1.09948	0.0126522	-0.758783
0.38847	0.23251	0.30412	0.06571	0.20344	0.20133	0.2504	0.17281	0.12116	0.032943	0.22474	0.064931	0.441191	-0.324741	0.234017
0.48883	0.27119	0.60023	0.27046	0.095333	-0.020526	0.12009	-0.0083717	0.16153	0.067492	0.11237	0.046463	1.00143	-0.324741	-0.191469
0.25216	0.070347	-0.43037	-0.58308	0.21423	0.66791	0.19755	0.62785	-0.1607	-0.073145	-0.18869	-0.079741	-0.119051	0.603091	0.375846
0.36101	0.63681	0.17411	0.28039	0.03593	0.34493	0.060044	0.41093	-0.036267	0.10909	-0.12342	-0.062475	-0.119051	-0.746483	-0.900612
0.079365	0.48178	-0.5284	0.02923	0.2132	0.44153	0.097146	0.45957	-0.044792	0.053961	0.019931	-0.029324	-0.259112	0.350046	0.943161
0.68357	0.67806	0.17962	0.63976	0.39546	0.45069	0.53238	0.38172	0.32096	0.2888	0.89423	0.26686	0.30113	-0.746483	-0.758783
0.43973	0.80913	0.58335	0.83335	0.28554	0.43405	0.308	0.51486	0.38495	0.20349	0.26718	0.28004	-0.119051	-0.999528	0.234017
0.7242	0.72634	0.77274	0.77011	0.19015	0.27728	0.30139	0.43829	0.038129	0.0542	0.11001	0.043478	-2.21996	-0.830831	-0.900612
0.2966	0.33126	0.59276	0.6035	0.4481	0.90845	-0.05559	0.08589	0.050227	0.4176	0.01663	-0.19985	0.30113	1.78397	0.234017
-0.27464	-0.16381	-0.38346	-0.36323	0.1657	0.26634	0.27413	0.24846	0.17955	0.26003	0.17901	0.18149	-1.3796	-0.0716961	-1.04244
