# Supplementary material for: Context-dependent modulations of subthalamo-cortical synchronization during rapid reversals of movement direction in Parkinson’s disease
Source: eLife. 2025 Jun 5;13:RP101769. doi: 10.7554/eLife.101769 (PMC12140627; doi:10.7554/eLife.101769)
Supplement: Supplementary file 10. [file elife-101769-supp10.xlsx]

## Sheet: coherence_beta
contraM1_pred_start	contraM1_pred_stop	contraM1_pred_rev	contraM1_unpred_start	contraM1_unpred_stop	contraM1_unpred_rev	contraMSMC_pred_start	contraMSMC_pred_stop	contraMSMC_pred_rev	contraMSMC_unpred_start	contraMSMC_unpred_stop	contraMSMC_unpred_rev	ipsiM1_pred_start	ipsiM1_pred_stop	ipsiM1_pred_rev	ipsiM1_unpred_start	ipsiM1_unpred_stop	ipsiM1_unpred_rev	ipsiMSMC_pred_start	ipsiMSMC_pred_stop	ipsiMSMC_pred_rev	ipsiMSMC_unpred_start	ipsiMSMC_unpred_stop	ipsiMSMC_unpred_rev	speed_normalinormalizeded	age_normalized	updrs_normalized	diseasedur_normalized
-0.010334	-0.007027	0.0073533	-0.0012481	0.0088908	-0.00095682	-0.0039509	-0.0050074	-0.0004519	-0.006961	-0.008194	-4.9e-05	-0.011086	-0.013272	0.010623	0.00026311	-0.0058566	-0.00022257	0.0049338	-0.01005	0.0082489	0.0010922	-0.0017413	-0.00011189	-0.712522	0.581251	-0.0716961	-1.04244
0.0059777	0.0023491	0.018479	0.00605	-0.0010345	0.0016187	0.0010142	0.00011967	0.0051875	0.013388	0.0068454	0.0042521	-0.0069733	0.012681	-0.0015579	-0.0049986	0.042958	0.0027672	0.00079379	-0.0023282	-0.000807	0.0017518	0.0056442	0.0069719	-0.0505508	0.16107	0.856135	3.07059
-0.011509	0.031749	0.0040486	-0.0074456	0.02392	0.0020253	-0.00079445	0.00065048	-0.0014381	-0.0022659	0.0048025	-0.00099826	0.00090585	0.0029834	0.0011572	-0.0002647	0.00073149	-0.0012643	0.030982	0.0068712	-0.025975	-0.018571	0.015613	-0.0085325	1.59997	-0.259112	0.181349	-0.616955
-0.020249	0.018686	0.0011143	-0.028247	0.018074	0.003839	-0.007414	0.010642	0.0040065	-0.0057581	0.014014	-0.00086311	-0.0047815	-0.0092891	-0.011995	-0.0015619	-0.0052071	-0.0054568	-0.00098337	0.0033725	0.00025896	0.0034095	0.0012311	0.00027677	-0.646167	-1.23954	2.7118	-1.18427
-0.0037471	-0.00037825	-0.00089585	-0.0040173	0.010523	6.1e-05	0.0034486	0.0069446	0.0019175	-0.0072363	0.004246	-0.0010155	-0.0045112	0.0078346	0.0012775	0.0029406	0.0026807	0.0023734	-0.0047598	0.0021253	-0.00015584	-0.0081133	0.0043953	-0.00074586	-0.345134	0.0210091	1.02483	1.08499
0.0077243	0.004414	0.0072221	0.01732	0.0044601	0.016362	0.036943	0.041428	0.042241	0.05283	0.063533	0.069471	-0.009681	0.0086104	0.00087293	-0.0012095	0.0022475	0.00023887	-0.0042448	0.0058137	-0.0010494	-0.0054987	0.003694	-5.9e-05	1.1529	1.28155	-0.830831	0.375846
-0.0085324	0.0027914	0.0016903	-0.0056094	0.0013561	0.0010422	-0.0019122	0.0013831	-0.00072333	-0.0019531	0.0041244	-0.0026235	-0.0021359	-0.0012687	0.0013611	-0.0078776	0.0033811	-0.0017547	-0.0091927	-0.0032032	0.0012991	-0.010695	0.0087539	0.0025186	1.33538	0.0210091	-0.915179	0.375846
-0.0061029	0.017062	0.01803	0.0024466	0.010356	0.019443	-0.00323	0.0025012	0.012716	0.0021524	0.0036376	0.015937	-0.001561	-0.014481	0.011642	0.0098962	-0.013927	-0.0029249	0.016033	0.02918	0.029093	0.022111	0.010568	0.037645	0.252567	2.40204	-1.16822	0.375846
0.0042307	-0.0024254	0.00064177	-0.0065155	0.020358	0.0067068	-0.000749	0.00010618	-0.0043408	0.0016775	0.00053755	0.0018812	0.0016466	0.0015404	-0.0046772	0.0016474	0.0041581	0.0019861	0.00085526	0.0012833	0.00046531	-5.7e-05	-0.0029367	0.0018992	0.244894	0.30113	-0.493438	0.0921886
-0.001047	0.0014206	0.00026463	0.0002894	4.1e-05	0.00014557	-0.0012343	0.00078833	0.0016189	-0.0013478	0.00056378	-0.00032901	-0.0019261	0.0016039	0.00098937	-0.0029349	-3.6e-05	-0.0011447	-0.0011084	-0.00035787	0.0029419	-0.00081653	0.0011045	-0.0017294	0.0660612	-1.09948	0.0126522	-0.758783
0.007125	-0.0074684	0.002183	0.0042264	-0.0039145	0.0017512	-0.01968	0.032387	-0.0016187	-0.015825	0.051983	0.0012498	0.0011854	0.0030748	-0.0016883	0.00050141	0.0011548	-9e-05	-0.0030792	0.0066613	-0.00088121	-0.0024743	0.0054726	-0.0010421	-1.2951	0.441191	-0.324741	0.234017
-0.0063365	0.0082564	-0.0002073	-0.00765	0.012252	0.0045307	-0.0033924	0.0078469	0.0014466	-0.0048708	0.0051556	0.0095362	-0.013742	0.02226	-0.0049808	-0.013475	0.024718	-0.00021451	-0.0036225	0.0052382	0.00058526	-0.0036107	0.008336	0.0002557	-1.56773	1.00143	-0.324741	-0.191469
-0.00048328	0.0073175	-0.0016084	0.0047952	-0.0033163	0.00020302	-0.0059694	-0.00014762	-0.0040675	0.0030238	0.00032729	-0.0052684	0.015016	-0.012056	-0.010954	-0.00048364	0.0090158	-0.004062	-0.0030574	0.01313	-0.00040542	-0.010329	0.013596	0.0049525	-1.07753	-0.119051	0.603091	0.375846
-0.0052545	0.011729	-0.0026933	-0.0046954	0.00028683	-0.00038091	-0.00027478	0.0052737	0.0026712	0.010859	-0.012107	0.0025817	-0.0068826	0.0091957	0.0016522	-0.00027355	0.00021982	0.0018858	-0.0076194	-0.0071932	0.0027948	0.0087004	-0.0062188	0.00077517	0.438022	-0.119051	-0.746483	-0.900612
-0.029527	0.027196	-0.00092177	-0.019216	0.036409	0.0011238	-0.0087143	0.0064758	-0.0024783	-0.0054703	0.0083378	0.0029137	-0.012018	0.0019828	-0.0011197	-0.01	0.005649	-0.00018292	-0.008417	-0.0024288	-0.0022699	-0.0097497	0.0010218	-0.0029926	0.165763	-0.259112	0.350046	0.943161
-0.0074647	0.026419	-0.00086927	-0.0055672	0.027353	-0.00015561	-0.0054797	0.030994	-0.0022779	-0.0042593	0.026055	-0.00023384	-0.0014504	0.00081206	-0.0016411	-0.00061444	4.7e-05	-0.00048482	-0.001436	0.001436	-0.0015207	-0.0007032	-0.00077911	-0.00089548	1.17531	0.30113	-0.746483	-0.758783
-0.020779	0.022646	0.0029925	-0.013509	0.023942	0.0030156	-0.0081131	0.03143	0.005047	-0.0096597	0.025452	0.0010326	-0.012475	-0.0036344	0.0084303	0.006912	0.0018511	0.0020469	-0.0039582	0.0084661	0.0042906	0.00062383	0.0037115	0.0061986	1.72076	-0.119051	-0.999528	0.234017
-0.0025996	0.0039776	0.00039933	0.00097619	0.0054	0.00018571	-0.0029917	0.00032767	-0.00037655	0.00098616	0.0062071	0.0018189	-1.9e-05	0.0011534	0.00019718	-0.0011604	0.0032916	-0.0035275	0.00087555	-0.00089522	-6e-05	-0.00094567	0.00062378	0.0006121	-1.24927	-2.21996	-0.830831	-0.900612
0.0005816	0.002314	-3.76e-05	-0.0044262	0.0043571	0.002157	0.000592	0.0027223	0.0005271	0.00217575	0.0073282	0.0034122	0.000244	-0.0001406	-0.00040077	-0.0006574	0.0016963	-0.00342	6.83e-05	0.00014184	0.00025473	-0.003852	-0.0037229	-0.0003562	-0.553751	0.30113	1.78397	0.234017
-0.0058325	0.0073903	0.00091068	-0.0047173	0.008353	0.0018117	-0.0096375	0.012118	-0.00038412	-0.010462	0.0097059	4.4e-05	-0.015539	0.005868	-0.0038959	-0.010313	0.008353	-0.0050903	-0.0032945	0.001861	-0.0019273	-0.008354	0.0059915	-0.0037622	-0.653857	-1.3796	-0.0716961	-1.04244

## Sheet: coherence_gamma
contraM1_unpred_rev	contraMSMC_pred_start	contraMSMC_pred_stop	contraMSMC_pred_rev	contraMSMC_unpred_start	contraMSMC_unpred_stop	contraMSMC_unpred_rev	ipsiM1_pred_start	ipsiM1_pred_stop	ipsiM1_pred_rev	ipsiM1_unpred_start	ipsiM1_unpred_stop	ipsiM1_unpred_rev	ipsiMSMC_pred_start	ipsiMSMC_pred_stop	ipsiMSMC_pred_rev	ipsiMSMC_unpred_start	ipsiMSMC_unpred_stop	ipsiMSMC_unpred_rev	speed_normalinormalizeded	age_normalized	updrs_normalized	diseasedur_normalized
-0.00073139	-2.6103e-06	0.00063693	-0.0016167	-0.00035607	0.0022094	-0.00013657	0.00022523	-2.9574e-05	-0.00048256	0.00042917	4.2911e-05	-3.2691e-05	-0.00068955	0.00024259	0.00049575	0.00060935	0.0019015	-0.00075073	-0.712522	0.581251	-0.0716961	-1.04244
0.00030291	-0.0010745	-0.0008946	0.002046	-0.00069956	-4.5209e-05	0.0011423	-6.6873e-05	-0.00083643	-0.00081505	0.00017589	7.4471e-05	-0.00054507	0.00023571	0.00047633	-7.7992e-05	0.0036679	-1.8484e-06	-0.0010356	-0.0505508	0.16107	0.856135	3.07059
-0.00061165	0.00014153	0.00025514	0.00071589	-0.00022702	-0.0004703	-1.9519e-05	-5.4018e-05	-0.00020658	-0.00019869	0.0005556	0.00072111	-0.00084335	0.0001596	0.00035242	-0.00025759	-0.0013147	-0.00056217	0.00025979	1.59997	-0.259112	0.181349	-0.616955
0.00039076	-0.00043811	0.0002922	-0.00017513	-0.00023955	0.0007649	9.7497e-05	0.00053203	0.00030101	6.7376e-05	0.00055317	-0.00041618	0.00026895	0.00039897	-4.8124e-06	0.00020802	0.0014396	-0.00012743	-0.00062399	-0.646167	-1.23954	2.7118	-1.18427
0.00014113	0.00073986	-0.00023596	-0.00064686	0.0015093	-0.0022447	-0.00069733	0.0011495	-0.0012922	0.00048756	-0.00098316	0.00015218	0.00021104	0.0006666	0.0007108	9.3948e-05	-0.0013715	-0.0014991	-0.00052762	-0.345134	0.0210091	1.02483	1.08499
0.00082236	-0.00069203	6.3792e-05	-0.00030246	0.0002974	0.00037624	0.00031205	0.00056739	0.00063659	0.00030985	-8.2202e-05	-0.0003868	-0.0019021	0.00041171	6.863e-05	-0.00049165	0.00075666	-0.00026668	-0.0011656	1.1529	1.28155	-0.830831	0.375846
0.0005027	-0.00014866	6.0649e-05	-0.00053272	-0.00018147	0.0010244	-0.0004198	0.00026278	-3.8685e-05	0.00037786	-0.0002071	-0.00043225	0.00035241	-3.7688e-06	0.00028116	0.00039009	-0.00099937	0.00089933	-3.6009e-05	1.33538	0.0210091	-0.915179	0.375846
-0.00088359	-0.00056987	0.0004267	0.001005	0.00052559	-9.9331e-06	-0.00071624	0.00080135	0.0005137	0.00042364	0.00049288	-0.0016998	0.00068088	-0.00010591	0.00072881	1.7137e-05	0.00022992	-0.00025141	0.00010374	0.252567	2.40204	-1.16822	0.375846
0.00014966	-5.2727e-05	-0.00085986	-0.0002834	0.00014214	6.1584e-05	7.4207e-05	0.00028495	0.00082555	0.00025074	0.00038111	2.5587e-05	0.0008503	-0.0001487	0.00034181	0.0012202	2.3441e-05	0.00060067	0.00025694	0.244894	0.30113	-0.493438	0.0921886
0.00084531	-0.001193	0.00094911	0.00086603	0.00041181	0.00095445	0.0003505	0.00099957	-0.0012484	0.00033479	0.0025917	-0.0014617	5.2237e-05	-0.00057136	3.9662e-05	-0.0015077	0.00092691	-0.0004261	0.00055411	0.0660612	-1.09948	0.0126522	-0.758783
-0.00014332	-0.00014592	-9.7452e-07	-3.8174e-05	0.00026086	0.00029531	8.9842e-05	0.00036313	0.0013194	-0.00035438	0.00029328	-0.0001623	0.00027864	-0.00030383	-0.00021169	-0.00031072	-0.00028074	0.00053387	-0.00038066	-1.2951	0.441191	-0.324741	0.234017
-0.00018419	-9.6211e-05	-0.00057213	9.9568e-05	6.5578e-05	0.00028747	0.00032613	8.5009e-05	0.00015856	8.1216e-05	0.00013444	0.00027264	0.00016958	-0.0007893	0.00053248	-9.9796e-05	0.00064327	0.0014578	-0.00054182	-1.56773	1.00143	-0.324741	-0.191469
0.0019721	0.00020202	-0.00035276	0.00093034	0.00015645	0.0027667	-0.0022705	-0.00032001	0.00091781	0.00084205	0.00057039	0.00074427	-0.0001912	-0.00016028	0.00071077	0.00072942	0.0025604	-0.0017617	-0.00021669	-1.07753	-0.119051	0.603091	0.375846
-0.00097016	0.00033834	-0.0013334	-0.00045141	0.00022304	0.0015847	-0.00068483	0.00060498	0.0011224	0.0011506	0.0015357	0.0013857	-2.5753e-06	0.0017301	0.0015703	0.00028031	-0.0019607	-0.00036641	-0.00039635	0.438022	-0.119051	-0.746483	-0.900612
-0.0012521	-8.0236e-05	0.00032211	-0.00039906	-0.00065052	0.00026996	0.00010848	0.00014825	4.5336e-05	0.00064413	-0.00028418	0.00017465	0.00034977	0.0005795	0.00048507	0.00024457	5.9665e-05	-1.6716e-05	-0.0008956	0.165763	-0.259112	0.350046	0.943161
0.00037235	0.00022061	-8.708e-06	-0.00069165	0.0014297	-4.1409e-05	0.00032402	-0.00014242	0.00056982	-0.00012187	-0.00030902	0.00065685	0.00091961	2.1109e-05	0.00047385	-0.00069432	0.00067903	-0.00014129	0.00060113	1.17531	0.30113	-0.746483	-0.758783
-7.3343e-05	0.00092037	0.00074218	-0.00075527	7.6479e-05	-0.00064319	0.00064218	0.00078436	-0.00093752	0.00044063	-0.00046997	-0.00050709	0.00028697	-0.0010283	0.00011877	-0.00012593	9.7623e-05	-9.2132e-05	-7.7321e-05	1.72076	-0.119051	-0.999528	0.234017
0.00055651	9.5799e-05	0.00024573	-0.00032962	-0.00014884	-0.00053397	-0.00024808	-0.00075069	0.00011916	-0.00025847	0.00035815	-0.00025387	0.00028262	-0.00025849	-0.00013962	-0.0003379	2.0578e-05	-8.1741e-05	0.00021224	-1.24927	-2.21996	-0.830831	-0.900612
0.0010548	-0.0005701	0.0015116	0.0015425	0.0014899	0.00022911	-0.00049387	0.00044556	0.00025043	-0.0008677	0.00027814	-0.00046743	0.00010538	0.0012603	-0.00042748	-0.000281	0.0012481	0.00052021	-0.0010931	-0.553751	0.30113	1.78397	0.234017
0.00044721	0.00089406	-0.00038179	8.9384e-05	-0.00023671	-0.00041216	-0.00063903	0.00077356	0.00022709	0.00047999	-0.00048563	0.00021052	-0.00052928	0.00030867	0.00031043	0.0001169	0.0001639	2.1792e-05	0.00033901	-0.653857	-1.3796	-0.0716961	-1.04244
