# Supplementary material for: Context-dependent modulations of subthalamo-cortical synchronization during rapid reversals of movement direction in Parkinson’s disease
Source: eLife. 2025 Jun 5;13:RP101769. doi: 10.7554/eLife.101769 (PMC12140627; doi:10.7554/eLife.101769)
Supplement: Supplementary file 11. [file elife-101769-supp11.xlsx]

## Sheet: granger_beta
start_pred_contra_M1_STN	start_pred_contra_STN_M1	start_pred_ipsi_M1_STN	start_pred_ipsi_STN_M1	start_pred_contra_MSMC_STN	start_pred_contra_STN_MSMC	start_pred_ipsi_MSMC_STN	start_pred_ipsi_STN_MSMC	start_unpred_contra_M1_STN	start_unpred_contra_STN_M1	start_unpred_ipsi_M1_STN	start_unpred_ipsi_STN_M1	start_unpred_contra_MSMC_STN	start_unpred_contra_STN_MSMC	start_unpred_ipsi_MSMC_STN	start_unpred_ipsi_STN_MSMC	stop_pred_contra_M1_STN	stop_pred_contra_STN_M1	stop_pred_ipsi_M1_STN	stop_pred_ipsi_STN_M1	stop_pred_contra_MSMC_STN	stop_pred_contra_STN_MSMC	stop_pred_ipsi_MSMC_STN	stop_pred_ipsi_STN_MSMC	stop_unpred_contra_M1_STN	stop_unpred_contra_STN_M1	stop_unpred_ipsi_M1_STN	stop_unpred_ipsi_STN_M1	stop_unpred_contra_MSMC_STN	stop_unpred_contra_STN_MSMC	stop_unpred_ipsi_MSMC_STN	stop_unpred_ipsi_STN_MSMC	rev_pred_contra_M1_STN	rev_pred_contra_STN_M1	rev_pred_ipsi_M1_STN	rev_pred_ipsi_STN_M1	rev_pred_contra_MSMC_STN	rev_pred_contra_STN_MSMC	rev_pred_ipsi_MSMC_STN	rev_pred_ipsi_STN_MSMC	rev_unpred_contra_M1_STN	rev_unpred_contra_STN_M1	rev_unpred_ipsi_M1_STN	rev_unpred_ipsi_STN_M1	rev_unpred_contra_MSMC_STN	rev_unpred_contra_STN_MSMC	rev_unpred_ipsi_MSMC_STN	rev_unpred_ipsi_STN_MSMC	speed_normalized	age_normalized
0.002698	-0.00274981	0.00302659	-0.00286559	-0.000243523	0.00123492	-0.00129972	0.000532732	-0.00129838	0.00273885	0.00317881	-0.00385144	0.00257338	-0.00149768	-0.000333	-9.99512e-05	0.00913484	-0.0121681	0.00762409	-0.00793065	0.00560249	-0.00591236	0.00311028	-0.00413325	-0.000491904	0.00138117	0.00260584	-0.00450032	0.000999136	-0.00218599	0.000372989	-0.0010899	0.0080258	-0.0100191	0.00993178	-0.00939882	0.00409101	-0.00299941	-0.00185344	0.000342077	-0.000356157	-0.000473084	0.00883287	-0.00935365	0.00014741	0.000532583	0.0037957	-0.00373241	-0.712522	0.581251
0.00687562	-0.00992235	0.0041745	-0.0042395	0.00392997	-0.00544243	0.0028479	-0.00290698	0.000765132	-0.00108039	0.00732972	-0.00725012	0.0014935	-0.00252213	0.00445676	-0.0039285	0.00416441	-0.0028541	0.00919777	-0.00887349	0.00268024	-0.00317738	0.00394046	-0.00473734	0.00184916	-0.00501605	0.0187687	-0.017343	0.0030057	-0.0053621	0.00613441	-0.00611279	0.00958819	-0.00990601	0.0037634	-0.00470433	0.00200302	-0.000839371	0.00572123	-0.00572045	0.00411092	-0.00461842	0.00445768	-0.0047942	0.00265529	-0.00212138	0.00627415	-0.00631788	-0.0505508	0.16107
-0.000175951	-0.000678044	0.00515393	-0.00777652	0.000456452	-0.00113061	0.0745767	-0.101517	0.00189179	-0.00268155	0.00265368	-0.00459999	0.000240464	0.000140361	0.0497614	-0.0778216	0.0276947	-0.026864	0.0030256	-0.00597763	0.00186531	-0.00164692	0.0324688	-0.0486138	0.030698	-0.028244	0.00233486	-0.00458486	0.00191632	-0.00193723	0.044093	-0.0696968	0.000662345	5.69342e-05	0.00354502	-0.00610354	-3.55316e-05	0.000469318	0.0221381	-0.0371875	0.000112156	-0.000349645	0.00259012	-0.0038816	-0.00203794	0.000564058	0.0378603	-0.0582011	1.59997	-0.259112
0.000839825	-0.00111063	0.00170254	-0.00180384	-0.000296751	8.25333e-05	0.00104756	-0.000767831	-0.0015669	0.00124412	0.00142368	-0.000841545	-0.000505457	8.84151e-05	-0.000698038	0.00134156	0.00632393	-0.00446577	0.00219381	-0.0026666	0.00573536	-0.00498689	0.00073868	-0.000473139	0.00368339	-0.00248353	0.000350914	-0.00138542	0.00481731	-0.00351492	0.000333919	-0.000480569	0.00130743	-0.000951216	0.00206223	-0.002333	-0.00118152	0.000991588	-0.000251288	0.000314117	0.00234796	-0.00119184	0.00217844	-0.00250389	-0.00191782	0.00129928	-0.000121749	3.25962e-06	-0.646167	-1.23954
-0.000405243	0.000354086	0.00151815	-0.00106039	0.0054659	-0.00582296	0.00172359	-0.000390621	-0.000382283	0.0007735	0.0012366	-0.00113388	0.000856729	-0.000737509	0.00239026	-0.00230067	0.000667108	-0.000845519	0.00288753	-0.00243126	0.00281482	-0.00208788	0.00408834	-0.00302679	0.00538194	-0.00511383	0.00138919	0.000229822	0.00378776	-0.00390169	-0.00230892	0.00551825	-0.000731516	0.000563486	0.000625553	-0.000435146	9.62078e-05	-0.000374283	0.00262969	-0.00205996	-0.000121374	-0.000265459	0.000655592	-4.0277e-05	-0.000508485	0.000317448	-0.00116916	0.00118789	-0.345134	0.0210091
0.00654458	-0.0105538	0.00282395	-0.00149247	0.0473767	-0.0736994	0.00295881	-0.00273574	0.00942566	-0.0166895	-0.000318522	-7.69219e-05	0.0655668	-0.102068	0.00158654	-0.00165975	0.00852127	-0.0119482	-0.000373529	0.000264972	0.0541283	-0.0890454	0.00664884	-0.00550011	0.0106347	-0.0143833	-0.0014617	0.00031814	0.0773061	-0.119034	0.0049068	-0.00398759	0.00177723	-0.00373297	0.000668591	-0.00051416	0.0220817	-0.0339641	0.00220112	-0.00177041	0.00733326	-0.0114076	-0.000242332	-0.000389555	0.0520646	-0.0758506	0.00135226	-0.00112981	1.1529	1.28155
0.00026979	-0.000163497	0.00112681	-0.00116153	0.000410207	-0.000512849	0.0010241	-0.00131284	8.36931e-05	-0.000364713	-0.000297379	0.000148488	0.000653838	-0.000802399	0.00115524	-0.000609895	-0.000333552	0.000377702	7.77208e-05	-0.000737059	0.00100187	-0.000656621	0.00435161	-0.00353406	6.89642e-05	-0.000681304	0.000528603	-0.00190271	-0.000224429	-0.000172133	0.0060875	-0.00722933	0.000508292	-0.000770824	0.000946632	-0.00108546	0.000855791	-0.00128677	0.000969287	-0.0018225	-0.000274736	-1.07927e-05	-0.00110819	0.000380747	0.00093172	-0.00118694	0.00257212	-0.00304998	1.33538	0.0210091
-2.41364e-06	-0.00389241	0.00218315	-0.00184307	0.00582643	-0.00710196	0.01234	-0.0119166	0.000825135	-0.00478994	-0.0019955	0.0011394	0.00873057	-0.0124826	0.0121414	-0.0116912	0.0154382	-0.0230537	0.00176032	-0.00411297	0.00152921	-0.00286886	0.0159062	-0.0280332	0.0143367	-0.014942	-0.00160974	-0.00153704	0.0022569	-0.00498739	0.0107029	-0.019581	-6.92117e-05	-0.00399617	0.010821	-0.0123227	0.0110543	-0.0143302	0.0106911	-0.0161512	0.00127852	-0.00539062	-0.00156857	0.000604597	0.0107831	-0.0127257	0.0131688	-0.0175516	0.252567	2.40204
0.00164697	-0.00108707	-0.000941574	0.000999011	-0.000169457	-5.16769e-05	-0.00044343	0.000183846	0.000356577	-0.000169277	0.00745431	-0.00582462	0.000237941	-0.000639319	3.88129e-05	-0.000414933	0.000831306	-0.000943422	0.000723339	-0.000757371	0.00205508	-0.00199833	-0.000429872	0.000367382	0.00167187	-0.00197265	0.00803186	-0.00648579	0.000845477	-0.000835378	0.00128496	-0.00142527	0.00339204	-0.0031861	0.000234375	0.00066835	0.000199546	-0.000786411	0.000721919	-0.000652138	0.000531744	-0.000711858	0.00310102	-0.00264082	0.00268807	-0.00322095	2.62221e-06	-0.000387653	0.244894	0.30113
-1.30095e-05	6.77132e-05	0.000262209	0.000311807	0.000231461	-0.000145884	9.14713e-05	5.77689e-05	-0.000387642	0.000109315	-0.000404908	0.000367661	-0.000477355	0.000296988	-0.000815912	0.00072497	-0.000639181	-0.000520178	0.0011631	-0.00113171	0.00113663	-0.00151463	0.00113366	-0.00073674	-0.00111205	0.000647588	0.000678303	-0.000352311	-0.000857439	0.000358919	0.000513157	-0.000229972	0.000824993	-6.66884e-05	0.00135626	-0.0010267	0.000256688	-0.000550536	-0.00162411	0.00171101	0.000117913	-0.000135997	0.00033199	-0.000399593	-8.14497e-05	-1.16827e-06	0.000107886	-0.000229139	0.0660612	-1.09948
0.00152618	-0.00076494	0.000966464	-0.000533709	0.00766559	-0.0070304	-1.67605e-05	-0.000478193	0.000937062	-0.00139579	4.59181e-05	5.29565e-05	0.0141214	-0.0154105	0.000770511	-0.00109626	0.000188947	-0.000187899	-2.40869e-06	0.000457424	0.0283352	-0.0512246	-0.00407232	0.00377715	7.28725e-05	-8.79142e-05	0.00071377	-8.29273e-05	0.0399882	-0.0609199	-0.00141736	0.000531637	0.00196012	-0.00330798	0.000752773	-0.000104522	0.013611	-0.0198801	-0.000164361	-0.000236955	-0.00144759	0.00135251	0.0012178	-0.000619654	0.0123438	-0.020244	-0.000472481	9.31263e-05	-1.2951	0.441191
0.00167472	-0.00154411	0.00079213	-0.00110034	0.00155589	-0.000539622	0.000362076	-7.0986e-05	-0.000652267	0.00114077	0.000639743	-0.000551535	-0.000375528	0.000745538	-0.000701502	0.000353747	-0.00092026	0.000795708	-0.000949771	-0.00348638	-0.00169865	0.00075595	0.0026485	-0.00254467	0.00197009	-0.00175132	-0.000988076	-0.00249474	0.00138583	-0.00166037	0.00347313	-0.00343971	0.00160861	-0.00105071	0.00131549	-0.00117343	0.00276334	-0.00228355	0.00231766	-0.00163461	0.00258267	-0.00198452	0.00157472	-0.00131501	0.0066261	-0.00530059	0.000119406	-5.00334e-05	-1.56773	1.00143
0.00187752	-0.00178772	0.0174764	-0.0141346	0.0112591	-0.00991048	0.0119558	-0.0132035	0.000295765	-0.00102459	0.005164	-0.00166058	0.0120641	-0.0116854	0.00221977	-0.00218172	0.00198827	-0.000802608	0.00781787	-0.0102916	0.00922214	-0.00546963	0.0139236	-0.0176237	0.00139904	-0.00044873	0.0120684	-0.00840659	0.00389011	-0.0040442	0.0174072	-0.0150776	3.06192e-05	-9.52042e-05	0.00469012	-0.0020069	0.00571224	-0.00423967	0.0058031	-0.0059911	-0.00208538	0.000683618	0.0032971	-0.00271813	0.000387659	0.000109071	0.00808366	-0.0090433	-1.07753	-0.119051
0.000730413	-0.000189972	-0.000737707	0.00121353	0.00171396	-0.00204129	-0.00624188	0.00653475	-0.000175901	-0.000319774	-0.000925287	0.000481932	0.00187754	-0.00190166	0.0088657	-0.00860803	0.0019767	-0.00294315	-0.00674894	0.0060843	0.00351602	-0.00602322	-0.00359453	0.00395409	0.000672197	0.000339423	-0.00364002	0.00383144	-0.000174954	0.000163591	0.00231268	-0.00231177	-0.00060658	0.000404067	0.000515609	-0.00112316	0.0135622	-0.0118913	-0.00243617	0.00261609	-0.00126063	0.000453036	0.00283567	-0.00230526	0.006963	-0.00788709	0.00493142	-0.00427333	0.438022	-0.119051
2.01362e-05	-0.000852863	0.00118481	-0.00128689	0.000325045	-0.000587974	0.00432552	-0.00462566	0.00107386	-0.000653491	-0.000450144	0.000650543	-0.000444655	-1.65172e-05	2.43565e-05	-2.82124e-05	0.0181045	-0.0112258	0.00490464	-0.00495196	0.00347787	-0.003303	0.000350481	-0.00239962	0.0236612	-0.0116989	0.0023055	-0.00334179	0.00196301	-0.00204433	0.000780624	-0.00126225	0.000705502	-0.000758751	-0.000266894	-0.00012486	3.64215e-05	-6.1903e-05	0.00205371	-0.00203892	0.000572042	-0.000395838	-0.00122117	0.00103698	-0.00161345	4.92904e-05	0.000561456	8.88875e-05	0.165763	-0.259112
0.000500654	-0.000497282	0.000245702	-0.000131336	8.52602e-05	-0.000142094	0.000275592	0.000289046	0.000448548	-0.000444422	0.000202314	-8.05274e-05	0.0001684	9.60396e-06	-2.54538e-05	8.64261e-05	0.00784215	-0.00334902	-0.000439331	0.000812585	0.0219635	-0.0259423	-4.58441e-05	-4.80837e-05	0.0101946	-0.00823147	1.02415e-05	-0.000170666	0.0177788	-0.019296	-0.000273114	0.000282145	0.00139493	-0.000850379	-0.000646991	0.000529047	0.000160441	-3.06475e-05	-5.67952e-06	4.23764e-05	3.3216e-06	0.000133094	-4.19024e-05	3.06471e-05	-0.00021873	0.00023673	0.000696678	-0.000624638	1.17531	0.30113
0.000615943	-0.000426857	0.0143987	-0.0123722	0.00292246	-0.00410817	0.00224051	-0.00294243	-0.00130431	0.00125705	0.018054	-0.0195093	0.00185688	-0.00227967	0.00174021	-0.00324199	0.00200524	-0.0040308	0.0166707	-0.0169848	0.00879539	-0.0143481	0.00226576	-0.00352657	0.00889949	-0.0114943	0.0112825	-0.0115643	0.00740713	-0.012585	0.0019813	-0.00326984	0.000988882	-0.000561968	0.0206908	-0.0169634	0.00371085	-0.00520574	0.00150065	-0.00313319	-0.000241848	0.00160487	0.0170602	-0.0186003	0.00101102	-0.00115879	0.00448498	-0.00797	1.72076	-0.119051
7.65669e-05	-0.000347834	0.00212481	-0.00144289	0.00116514	-0.00155856	0.00263126	-0.00230461	0.000231946	0.00019703	0.00116279	-0.000964307	0.0018967	-0.00353484	0.00133687	-0.000826178	-0.00400121	0.00452865	0.000973333	-0.000555938	0.00443285	-0.00600594	-7.77061e-05	0.000101539	-0.0019349	0.00148481	0.00178829	-0.00169612	0.00926435	-0.0110456	0.00113563	-0.000638363	0.00245858	-0.00125624	0.00227905	-0.0016441	-9.01842e-06	-0.000318997	0.00217697	-0.00176491	0.000501883	-2.17709e-05	0.00203141	-0.0012199	0.00352976	-0.00479138	0.000922277	-0.000262903	-1.24927	-2.21996
0.000150758	-0.000211221	-8.61304e-06	-1.90271e-05	0.000391799	-0.000406475	-0.000304465	0.000394958	0.000808726	-0.00226955	0.00100677	-0.00135618	0.00106673	-0.00288843	0.000119923	-0.000329357	-0.000795221	0.000577865	-0.000221889	1.84686e-05	-0.000772792	0.00054928	0.000732429	-0.000901871	0.000608136	-0.000774026	-0.000149232	4.52184e-05	-0.00174589	0.00179245	4.57791e-05	8.83219e-05	-0.000485736	0.000444455	1.83715e-05	0.000112909	-4.53058e-06	4.43274e-05	0.000880977	-0.000564542	0.00227376	-0.00265625	-0.000479831	0.00065646	0.00231118	-0.00349973	0.00142387	-0.000929171	-0.553751	0.30113
-8.54332e-05	-2.66329e-05	-0.000337956	0.000331452	-0.000398431	0.000612587	-0.000293426	0.000235639	-0.000508339	0.000719681	0.000820967	-0.000485288	-0.000171544	8.10389e-05	-0.000203633	0.000168327	0.000707356	0.000608227	0.00574031	-0.00472077	-0.00501268	0.00160459	0.000512127	-0.000487981	-0.0010198	-0.000548808	0.00587836	-0.00470925	-0.00159167	-0.000471253	0.00339224	-0.00319161	6.03675e-05	-2.35095e-05	0.000261684	-0.000301004	0.00061615	-0.000323945	0.000116517	-8.73091e-05	-0.000400754	-0.000278306	0.000384445	-0.000183287	-0.000576093	0.00107184	3.33123e-05	-0.000129365	-0.653857	-1.3796
[truncated: 2 more columns]

## Sheet: granger_gamma
stop_unpred_ipsi_MSMC_STN	stop_unpred_ipsi_STN_MSMC	rev_pred_contra_M1_STN	rev_pred_contra_STN_M1	rev_pred_ipsi_M1_STN	rev_pred_ipsi_STN_M1	rev_pred_contra_MSMC_STN	rev_pred_contra_STN_MSMC	rev_pred_ipsi_MSMC_STN	rev_pred_ipsi_STN_MSMC	rev_unpred_contra_M1_STN	rev_unpred_contra_STN_M1	rev_unpred_ipsi_M1_STN	rev_unpred_ipsi_STN_M1	rev_unpred_contra_MSMC_STN	rev_unpred_contra_STN_MSMC	rev_unpred_ipsi_MSMC_STN	rev_unpred_ipsi_STN_MSMC	speed_normalized	age_normalized	updrs_normalized	diseasedur_normalized
0.00126338	-0.00112987	-0.00198884	0.00169888	0.00146431	-0.0019638	-0.00050051	0.00048278	-0.000454075	0.00028889	0.0012526	-0.00183568	0.000662706	-0.000696538	-0.00186732	0.00129704	-0.000150679	0.000129775	-0.712522	0.581251	-0.0716961	-1.04244
0.000742445	-0.000681167	-0.000432958	0.000427031	-6.25794e-05	-0.000141586	-4.15973e-05	-9.26718e-06	0.00063998	-0.000552594	-9.4446e-05	0.000139945	0.0007234	-0.000696091	0.000428145	-0.000416101	-0.000450076	0.000118852	-0.0505508	0.16107	0.856135	3.07059
0.00121604	0.000181858	0.000336345	-0.000134154	0.000180868	9.31433e-05	-0.000310409	0.000319182	0.00152088	-0.000355323	0.000149703	-6.28076e-05	0.000198252	2.53624e-05	-0.000560537	0.000901034	0.00184601	0.000134875	1.59997	-0.259112	0.181349	-0.616955
-1.78402e-06	4.1356e-05	0.00073509	-0.000722096	-0.00015251	0.000115278	-0.000477	0.000673727	-0.000908428	0.000912807	-0.0002613	0.000237757	-3.16736e-05	-0.000168876	0.000262424	-0.000285568	0.000296707	-0.000388141	-0.646167	-1.23954	2.7118	-1.18427
-0.000847327	0.00058344	0.00137735	-0.00128442	-0.000934914	0.000949349	-0.000282779	0.000356064	-0.00088376	0.000680397	-0.000591081	0.000964178	-0.00026464	0.000331741	1.2554e-05	0.000156204	-0.000686475	0.000741984	-0.345134	0.0210091	1.02483	1.08499
0.000610668	-0.000168495	0.000304472	4.41969e-05	-0.000175247	0.000169186	0.00047213	0.000178699	-0.000833011	0.000406371	-0.000688143	0.000648195	-0.000107849	-0.000179591	0.00166185	0.000181842	-0.00112871	0.00114046	1.1529	1.28155	-0.830831	0.375846
0.0033514	-0.00328712	0.000241244	-0.000292969	-0.000298021	0.000287461	0.000341896	-0.000304889	-0.000172193	0.000667504	-5.25594e-05	3.95607e-05	-1.22935e-05	0.000110003	-0.000110012	0.000107044	-6.81654e-05	0.000453537	1.33538	0.0210091	-0.915179	0.375846
0.00207874	-0.000762856	0.000466061	0.000131661	-0.000434428	0.00130865	-0.00021876	0.000332227	0.00026044	-0.000236042	0.000260309	-3.57659e-05	0.00315038	-0.00195122	0.000660735	-0.000314021	-0.0014949	0.000894693	0.252567	2.40204	-1.16822	0.375846
8.16546e-05	-0.000162958	-8.33523e-05	0.000146889	-0.00137368	0.00102801	-0.000350312	0.000358685	0.000129118	0.000245928	0.000387068	-0.000309773	-0.00184029	0.00178263	6.14355e-05	-0.000251136	0.000317186	-0.000389895	0.244894	0.30113	-0.493438	0.0921886
-0.000134	-3.49801e-05	-0.00111687	0.000655411	0.000844878	-0.000992674	5.50438e-05	-5.32959e-05	-0.000142805	0.000410816	0.000830666	-0.000949869	0.000475457	-0.000407378	0.000164776	-0.000393017	0.000354061	-0.000633193	0.0660612	-1.09948	0.0126522	-0.758783
0.000113984	0.000148777	-0.000152758	0.000184276	0.000345819	0.000860979	7.69711e-05	-0.00010953	-8.76942e-05	2.28995e-05	-0.000134704	6.20442e-05	-0.00343916	0.00256835	0.000611903	-0.000190481	7.0201e-05	-0.00022191	-1.2951	0.441191	-0.324741	0.234017
-0.00111188	0.000894921	8.47896e-05	6.19581e-05	0.00115511	-0.000724944	-0.000754762	0.000730035	0.000438764	-0.000557942	0.00142545	-0.000965262	0.000627849	2.61497e-05	-0.000152846	2.54527e-05	0.000634772	-0.00103781	-1.56773	1.00143	-0.324741	-0.191469
-0.000330249	-0.000317792	0.00142555	-0.00113706	-0.00048542	0.000755238	-0.000814885	-0.000136215	-1.15295e-05	-9.98084e-05	-0.000774065	0.00100981	-0.000221766	0.000204654	0.000873559	-0.000652782	0.00012554	-0.000146964	-1.07753	-0.119051	0.603091	0.375846
-0.000373161	1.28634e-05	-0.00135206	0.00140961	-0.000611543	0.000630006	0.000479824	0.000264976	-0.00140644	0.000734373	-0.000484524	0.000921026	0.000396735	-0.000128422	0.00119451	-0.00129126	-0.00165156	0.00147456	0.438022	-0.119051	-0.746483	-0.900612
0.000100918	-0.000177954	-0.000445149	0.000388797	9.32861e-05	5.92806e-05	-0.00012664	-1.33664e-05	-0.000167031	0.000287993	-0.000199761	0.000197232	-1.61738e-06	8.87265e-05	2.85139e-05	-5.47822e-05	0.000309658	-0.000134925	0.165763	-0.259112	0.350046	0.943161
-6.2712e-05	4.04578e-05	8.39052e-06	7.09973e-05	0.00055303	-0.000597528	0.000431757	-0.000441549	0.000633552	-0.000511818	0.000336966	-0.000275884	-2.24262e-05	0.000129151	0.000256792	-0.000290255	-0.00123188	0.00168928	1.17531	0.30113	-0.746483	-0.758783
1.70886e-05	6.88598e-05	0.000343902	-0.000319458	0.000487133	-0.00079804	0.000138626	-0.000116485	5.7527e-05	5.5645e-05	-0.000238608	0.000142054	-3.18726e-06	5.47453e-05	0.000556976	-0.000562131	-0.000370648	0.000351052	1.72076	-0.119051	-0.999528	0.234017
-9.18018e-05	8.97687e-05	-9.4059e-05	-0.000240613	-0.000491865	0.000340825	2.55269e-05	1.34269e-05	-2.38325e-05	-8.06873e-05	-0.000208982	0.000218263	-0.000284147	0.000173117	0.000111668	-7.87149e-05	-0.000316465	0.000277357	-1.24927	-2.21996	-0.830831	-0.900612
0.000295672	-4.91669e-05	0.000608988	-0.00067808	0.000432636	-0.000414138	0.00107065	-0.00113968	0.000138654	0.000406159	-0.000856343	0.000872541	0.000497715	-0.00183949	-0.000442759	0.00054543	0.000521438	-0.00116964	-0.553751	0.30113	1.78397	0.234017
-2.52496e-05	0.00011464	0.000498686	-0.000800854	-0.000360351	0.000331018	0.000701543	-0.000806965	-0.000871457	0.0008787	-0.00031484	0.000662432	0.000106971	-0.000236992	0.0013802	-0.0019985	-0.000497617	0.00049276	-0.653857	-1.3796	-0.0716961	-1.04244
